# Supplementary material for: The possible formation of a magnetic FeS2phase in the two-dimensional MoS2matrix
Source: Royal Society of Chemistry journal article supplement (doi:10.1039/c6cp05065d), 2016-01-01
Supplement: c6cp05065d1.pdf [file c6cp05065d1.pdf]

## Supplementary materials

# The possible formation of magnetic FeS<sub>2</sub> phase in two-dimensional MoS<sub>2</sub> matrix

*L.Yu. Antipina<sup>1,2,3</sup>, A.G. Kvashnin,<sup>1,4</sup> P.B. Sorokin<sup>1,2,3</sup>, L.A. Chernozatonskii<sup>1</sup>*

<sup>1</sup> Emanuel Institute of Biochemical Physics, Russian Academy of Science., 4 Kosigin Street,  
Moscow, 119334, Russian Federation

<sup>2</sup> Technological Institute for Superhard and Novel Carbon Materials, 7a Centralnaya Street,  
Troitsk, Moscow, 142190, Russian Federation

<sup>3</sup> National University of Science and Technology MISiS, 4 Leninskiy prospekt, Moscow,  
119049, Russian Federation

<sup>4</sup> Skolkovo Institute of Science and Technology (Skoltech), Skolkovo Innovation Center  
143026, 3 Nobel Street, Moscow, Russian Federation

Corresponding author. E.mail: [cherno@sky.chph.ras.ru](mailto:cherno@sky.chph.ras.ru)

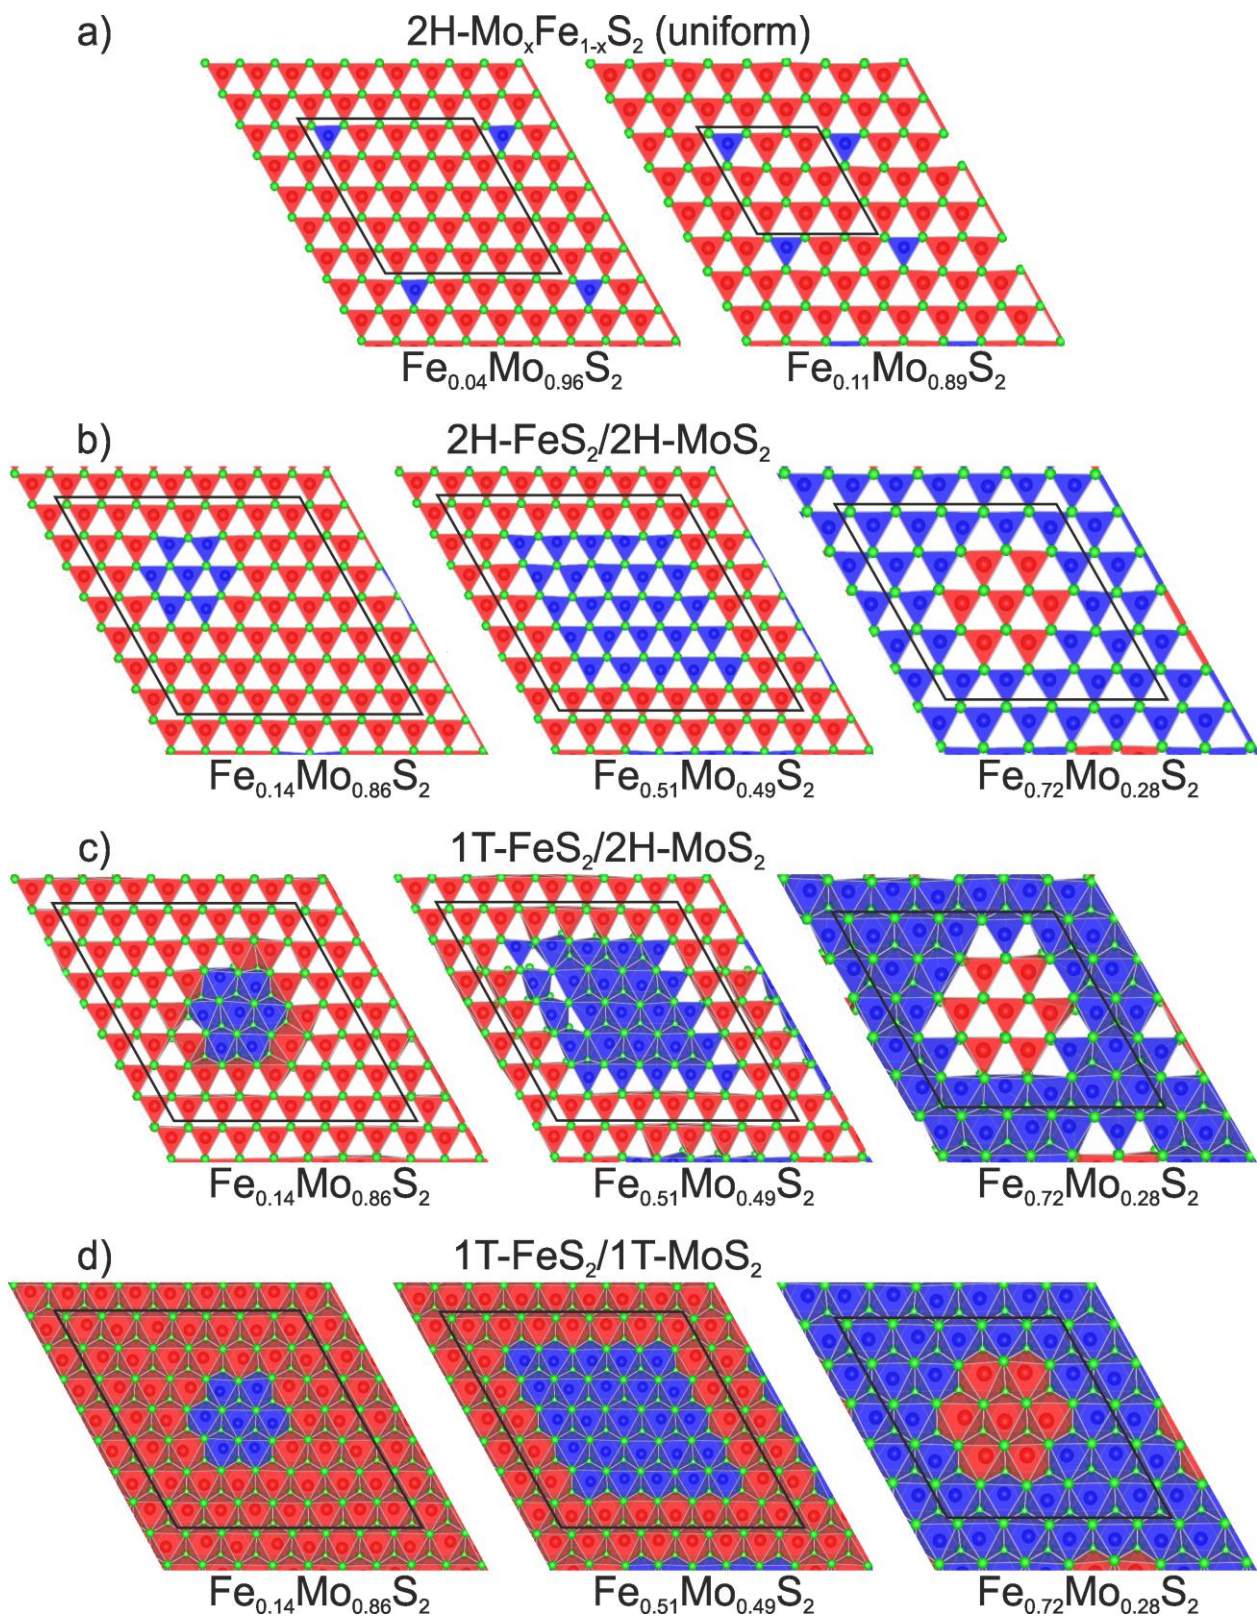

Figure S 1 – The chosen atomic geometries of cluster  $\text{FeS}_2$  in  $\text{MoS}_2$  structure for different concentration. a)  $2\text{H-MoS}_2$  uniform structure, b)  $2\text{H}$  cluster  $\text{FeS}_2$  in  $2\text{H}$   $\text{MoS}_2$  structure, c)  $1\text{H}$  cluster  $\text{FeS}_2$  in  $2\text{H}$   $\text{MoS}_2$  structure, d)  $1\text{H}$  cluster  $\text{FeS}_2$  in  $1\text{H}$   $\text{MoS}_2$  structure. The molybdenum, iron and sulfur atoms are presented in red, blue and green, respectively.

Results of evolutionary algorithm prediction

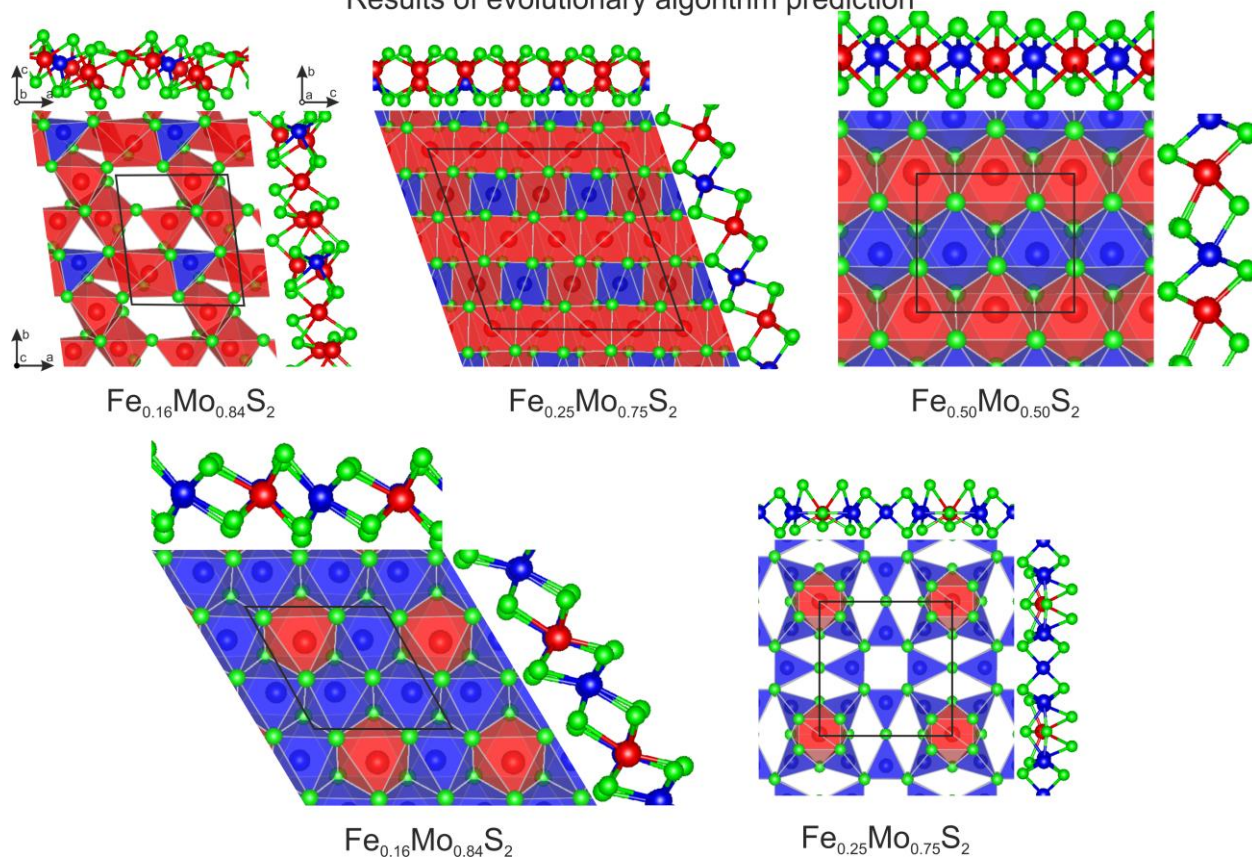

Figure S 2 – The atomic geometries of the most stable  $\text{Fe}_x\text{Mo}_{1-x}\text{S}_2$  structures, predicted by evolutionary algorithm USPEX. The molybdenum, iron and sulfur atoms are presented in red, blue and green, respectively.
